# Supplementary material for: Novel Plaque Enriched Long Noncoding RNA in Atherosclerotic Macrophage Regulation (PELATON)
Source: PubMed Central journal article supplement (PMC7043732; doi:10.1161/atvbaha.119.313430), 2019-12-12
Supplement: atv-40-697-s002.pdf [file atv-40-697-s002.pdf]

## Supplemental Material

### Title:

A Novel Plaque Enriched Long Non-Coding RNA in Atherosclerotic Macrophage Regulation (PELATON)

### Authors and affiliations:

J Hung<sup>1#</sup>, JP Scanlon<sup>1#</sup>, AD Mahmoud<sup>1\*</sup>, J Rodor<sup>1\*</sup>, M Ballantyne<sup>1</sup>, MAC Fontaine<sup>2</sup>, L Temmerman<sup>2</sup>, J Kaczynski<sup>1</sup>, KL Connor<sup>1</sup>, R Bhushan<sup>1,3</sup>, EAL. Biessen<sup>2</sup>, DE Newby<sup>1</sup>, JC Sluimer<sup>1,2†</sup>, AH Baker<sup>1,2†</sup>

<sup>1</sup>Centre for Cardiovascular Science, University of Edinburgh, Edinburgh, UK

<sup>2</sup>Maastricht University Medical Center, Maastricht, The Netherlands

<sup>3</sup>Current affiliation, Yenepoya Research Centre, Yenepoya University, Deralakatte, Mangalore, India

#, \*, †equal contribution

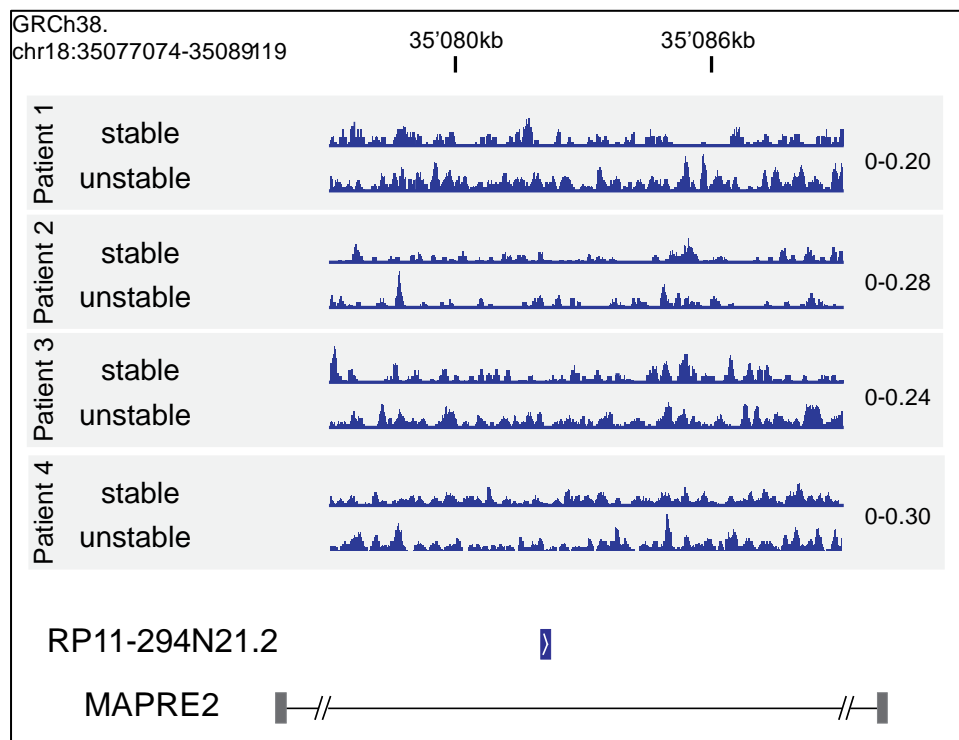

**Supplementary Figure 1: RP11-294N21.2 read mapping from RNA sequencing.** Reads for RP11-294N21.2 are randomly distributed, not consistent with an exonic structure and likely emanate from the nearby protein coding gene MAPRE2, and therefore represents a false positive.

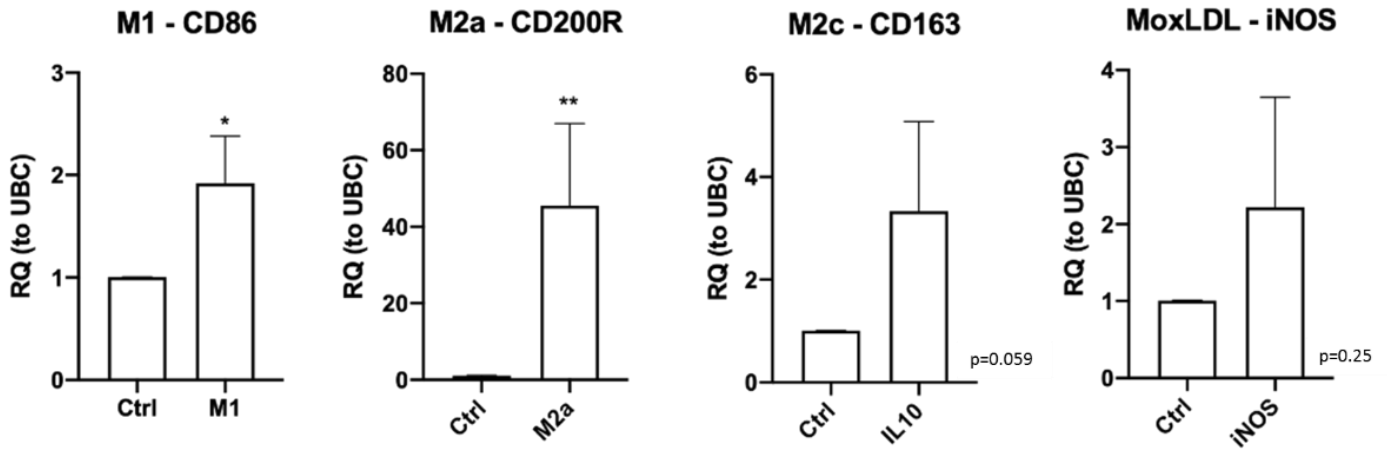

**Supplementary Figure 2. Markers of macrophage polarisation.** The expression of macrophage subtype specific markers was quantified by qRT-PCR on samples which had undergone phenotypic differentiation. N=3.

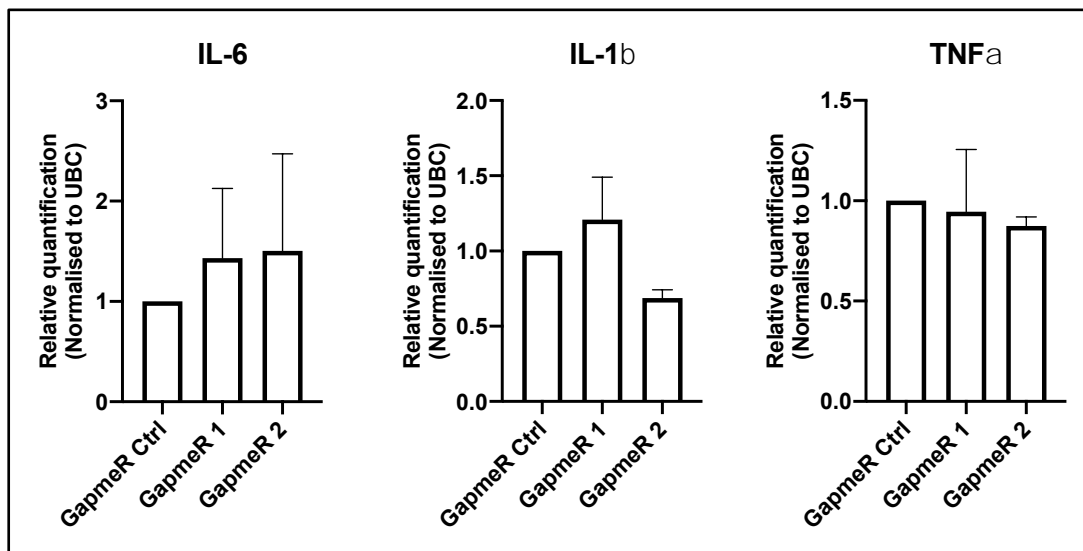

**Supplementary Figure 3. Inflammatory markers in PELATON Knockdown.** Expression of IL-6, IL-1 $\beta$  and TNF $\alpha$  were unchanged in cells where PELATON had been knocked down. The Kruskal-Wallis test applied for statistical significance, n=3 biological replicates.

## DAPI/PELATON

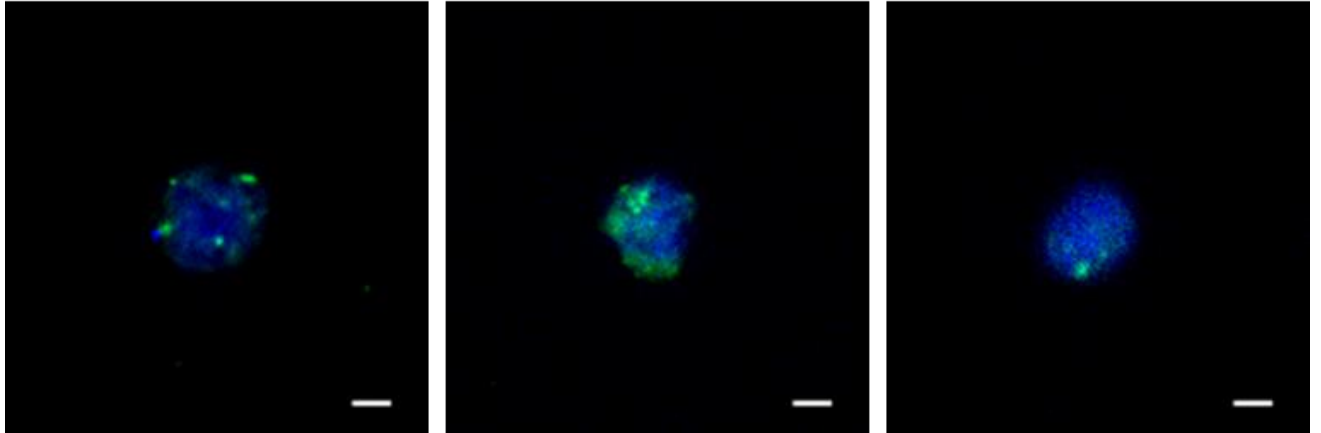

**Supplementary Figure 4. PELATON localisation in monocyte derived macrophages.** Localisation of PELATON (green) with DAPI nuclear costain (Blue), shown by RNA-FISH. Scale bar represents 5 $\mu$ m.

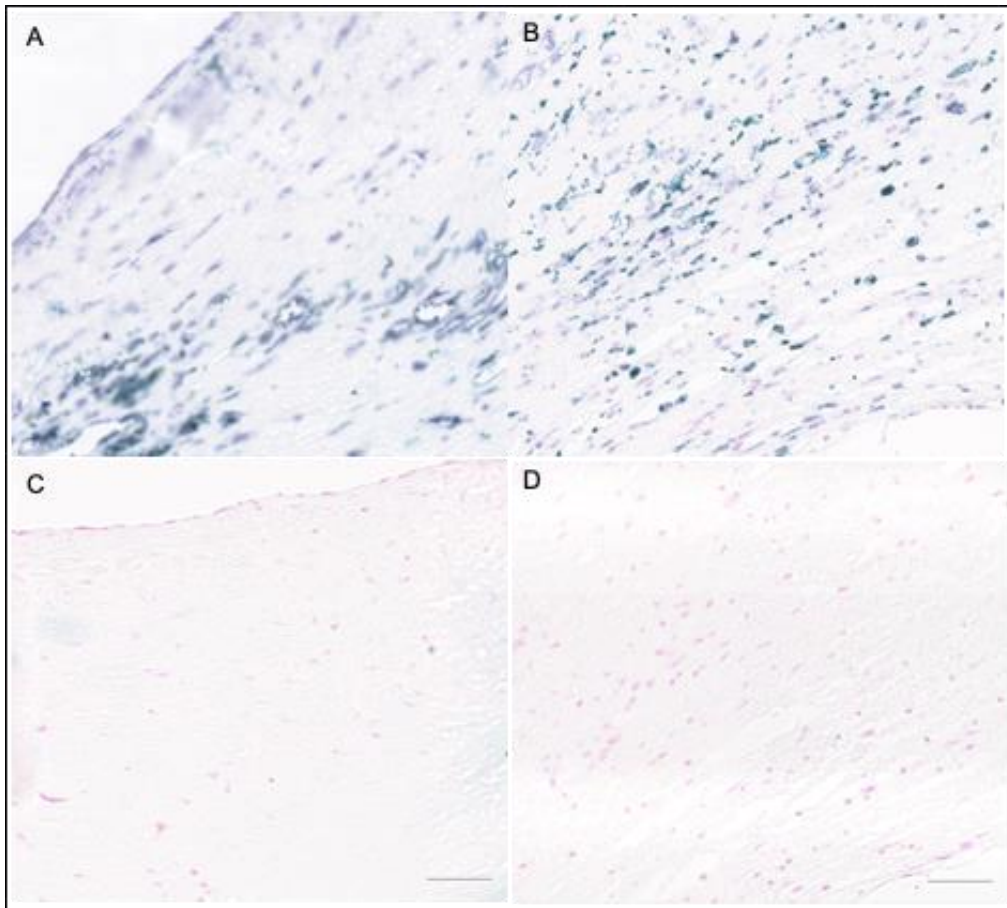

**Supplementary Figure 5: In situ hybridisation in atherosclerotic plaque.** (A, B) Co-localisation of PELATON (purple) with CD68 (green) n=2 replicates. (C, D) Corresponding serial sections of A, B stained with negative controls, scramble probe and IgG, n=2 replicates.

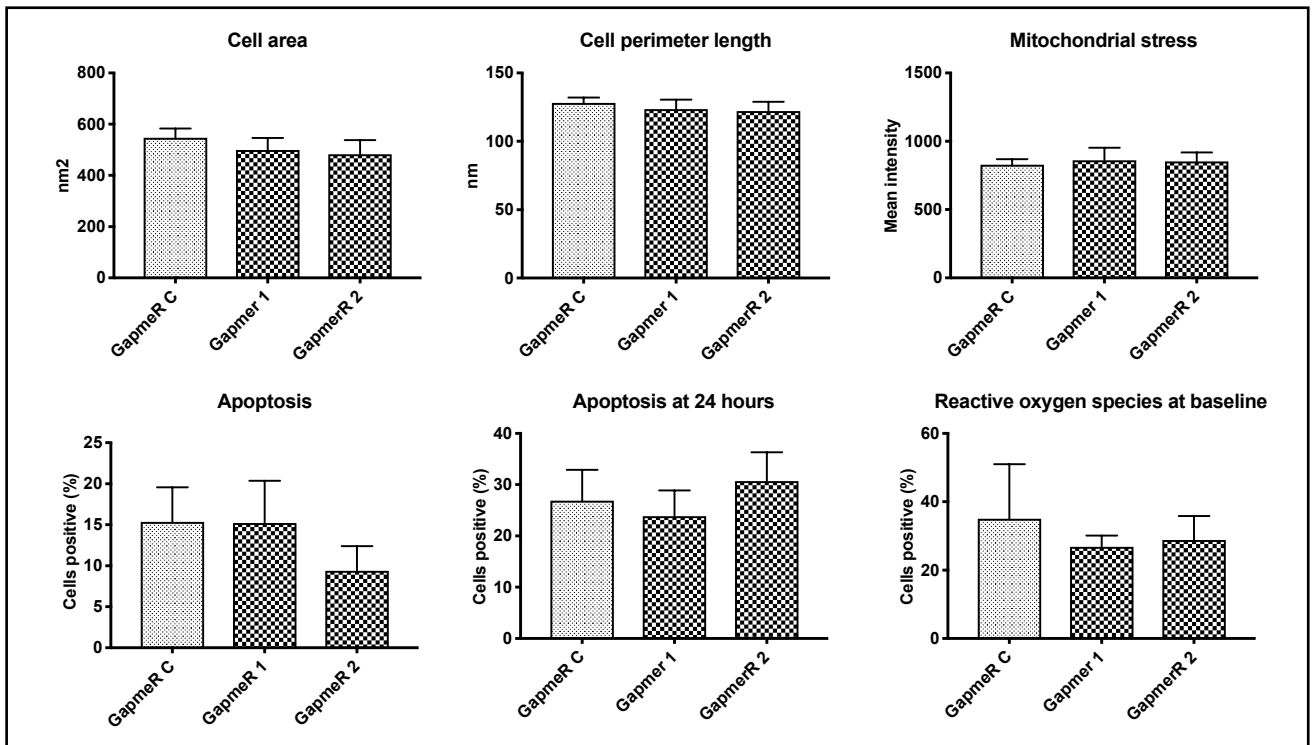

**Supplementary Figure 6. Effect of PELATON knockdown on macrophage functions *in vitro*.**

High content analysis on the effect of PELATON GapmeR knockdown on cell area, cell perimeter length, mitochondrial stress, apoptosis, apoptosis after 24 hours of staurosporin induction, and ROS species production at baseline. All HCA assays performed in 5 wells per condition, 9 images per well, biological n=2, pooled.

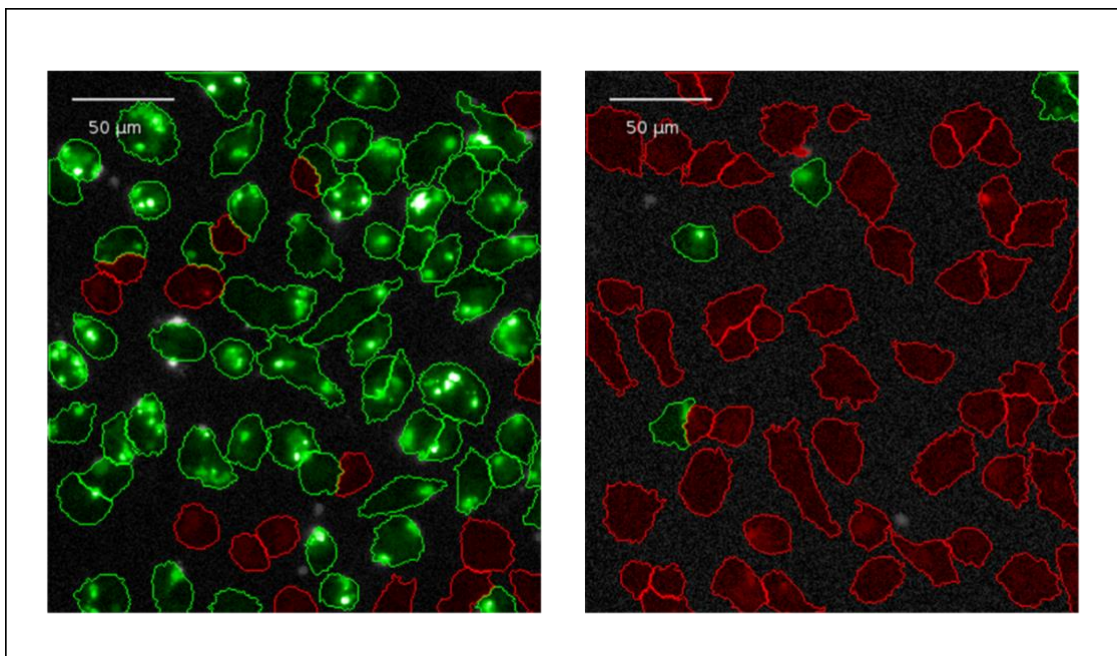

**Supplementary Figure 7. Effect of PELATON knockdown on phagocytosis *in vitro*.**

Images showing uptake of Red Zymosan Bioparticles in GapmeR control and PELATON GapmeR knockdown wells (Figure 5G, H), were run through Coumbus Analysis Software, automatically detecting cells via Hoechst, and the presence/absence of a phagocytosed particle within them, and showing them as green (positive) or red (negative). Representative images of control well and knockdown well.

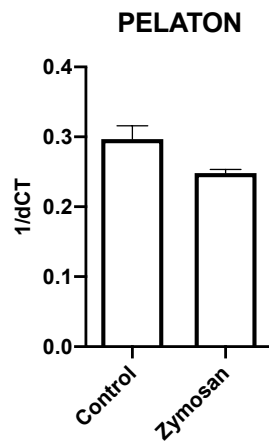

**Supplementary Figure 8. Expression of PELATON in phagocytosis.** PELATON expression was not significantly different in phagocytosing macrophages (Zymosan) compared with control. Wilcoxon matched pairs test for statistical significance, n=5 biological replicates.

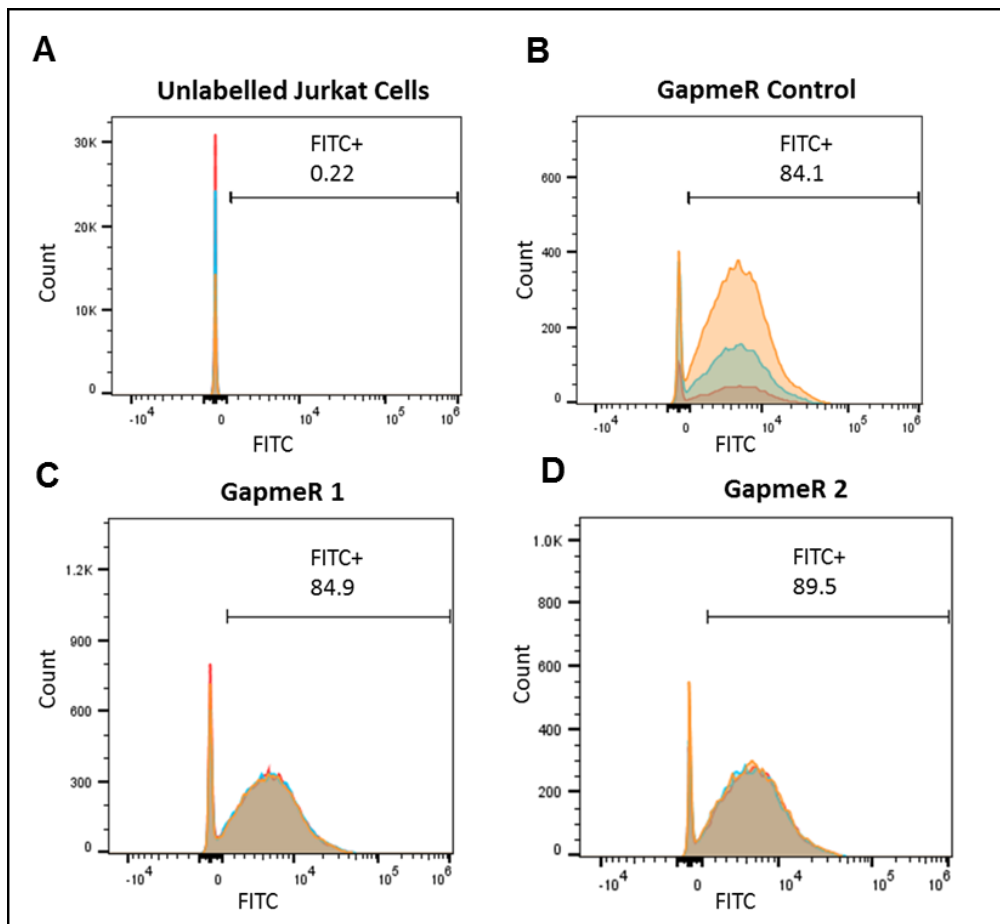

**Supplementary Figure 9. The effect of PELATON knockdown on efferocytosis.** FACS histogram, to show the presence of Calcein labelled (FITC+) Jurkat cells within macrophages, shown as percentage labelled in macrophages. (A) Unlabelled jurkat cells are used as a negative control. The percentage of FITC+ macrophages in (B) GapmeR control, and (C, D) PELATON specific GapmeRs,. Each plot shows an overlay of 3 replicates (orange, blue, red lines). FITC+ =Fluorescein positive cells.

| Gene ID       | Sequence                  |
|---------------|---------------------------|
| PELATON_Fw    | CCTTCCTTCTGCCTCCTG        |
| PELATON_Rv    | TTGCTGTGGACTGATGTGGG      |
| NEAT1_Fw      | TTGGGACAGTFFACGTGTGG      |
| NEAT1_Rv      | TCAAGTCCAGCAGAGCA         |
| PELATON+HA_Fw | GCCTCCACTGCCACCACTGC      |
| MLN+HA_Fw     | AAGATGAAATTGTGGGAAGA      |
| HA_only_Rv    | AGCGTAATCTGGAACATCGT      |
| BCAS4_Fw      | GAGCTCGCGCTCTTCCTGAC      |
| BCAS4_Rv      | AGGGGCTGGCTCTCATTGGT      |
| UBE2V1_Fw     | TGGAGTGGTGGACCCAAGA       |
| UBE2V1_Rv     | TAACACTGTCCTTCGGGCG       |
| PARD6B_Fw     | GGGCACTATGGAGGTGAAGA      |
| PARD6B_Rv     | TCCATGGATGTCTGCATAGC      |
| SPATA2_Fw     | AGCCAGACTTTGTTGGATTTG     |
| SPATA2_Rv     | TTTACTGGCGATGTCAATAGG     |
| RIPOR3_Fw     | TCCATTGAAGAGGAGGCTCG      |
| RIPOR3_Rv     | TCCCCTCCTAAGTTCCTCCA      |
| CD200R_Fw     | TGGATGAAAAACAGATTACACAGAA |
| CD200R_Rv     | TAATGCGATAGGAGGGCAAC      |
| CD163_Fw      | GATGTGGATCTGCACTCAA       |
| CD163_Rv      | TCCAGAGAGAAGTCCGAATC      |
| iNOS_Fw       | CTTTGATGAGGGGACTGGGC      |
| iNOS_Rv       | ATGTTCTTCACTGTGGGGCTTG    |

**Supplementary Table 1: SYBR Primers**

| Gene ID      | Catalogue Number |
|--------------|------------------|
| PTPN1        | Hs00942477_m1    |
| CEBPB        | Hs00942496_s1    |
| IL-6         | Hs00174131_m1    |
| IL-1 $\beta$ | Hs01555410_m1    |
| TNF $\alpha$ | Hs00174128_m1    |
| CD68         | Hs02836816_g1    |

**Supplementary Table 2: Taqman Probes**

| Gene      | Inserted sequence                                                                                                                                                                                                                                                                                                                                                                                                                       |
|-----------|-----------------------------------------------------------------------------------------------------------------------------------------------------------------------------------------------------------------------------------------------------------------------------------------------------------------------------------------------------------------------------------------------------------------------------------------|
| PELATON   | AAGCTTGGATCCCCACCATGAAGCTACTTGCCAAGGTCACGCAGCACA<br>GTCACATCCTACTGAACATCATCCTGTTCTCTGGGTGGAATGTCACCAT<br>CGCCCAGGTGGGGATTTTGTGTGTTTGTTCCTGCTGTACACCCAGC<br>CCCCAGCACAGCGCCTGTCCAGGACAAGTGCCAGTAAACACTTGGGA<br>AGCAATGCAAGCGTCTCCAGCAGCTCCTGCAAACAGACCCCCGACC<br>CAAGCCCTTCTTCTGCCTCCACTGCCACCACTGCTGCTCATCTCTGCT<br>GGCACAGAAGTCTCTTCCCTGGTCTTCCAGAAATCCCCTCTCCACACTC<br>AGCCAGAGGGAGCTATTACCCATACGATGTTCCAGATTACGCTTAACTC<br>GAGGATATC |
| LINC00948 | GGATCCCCACCATGACTGGTAAAAACTGGATATTAATTTCTACTACTACT<br>CCCAAAGTCTAGAAGATGAAATTGTGGGAAGACTTCTAAAAATTTTGT                                                                                                                                                                                                                                                                                                                                  |

|  |                                                                                           |
|--|-------------------------------------------------------------------------------------------|
|  | TGTTATCTTTGTTGACTTAATTTCTATTATATATGTTGTGATAACTTCTTA<br>CCCATACGATGTTCCAGATTACGCTTAACTCGAG |
|--|-------------------------------------------------------------------------------------------|

**Supplementary Table 3: Open reading frame sequences.** Both genes were flanked with restriction enzyme digestion sites, Kozak sequence, appended with HA tag, and inserted into pcDNA 3.1 (+) vectors.

| GapmeR ID      | Sequence        |
|----------------|-----------------|
| GapmeR control | AACACGTCTATACGC |
| GapmeR 1       | GAAGGGCTTGGGTCG |
| GapmeR 2       | AAGGAATCCGAGGGT |

**Supplementary Table 4: GapmeR sequences**

| Probe ID         | Sequence               |
|------------------|------------------------|
| Scramble control | GTGTAACACGTCTATACGCCCA |
| PELATON          | TTATTCTCCAAGCAACAGAGAT |

**Supplementary Table 5: In-situ hybridisation probes**

| Antibody | Supplier   | Concentration | Dilution |
|----------|------------|---------------|----------|
| CD68     | Dako       | 185mg/L       | 1:500    |
| SMA      | Dako       | 71mg/L        | 1:8000   |
| IgG      | Invitrogen | 3000mg/L      | 1:4000   |

**Supplementary Table 6: Immunohistochemistry probes**

| ID           | Supplier    | Cat no     |
|--------------|-------------|------------|
| LPS          | Thermo, UK  | 00-4976-93 |
| IFN $\gamma$ | Immunotools | 11343534   |
| IL-4         | Immunotools | 11340042   |
| IL-10        | Immunotools | 11340102   |

**Supplementary Table 7: Polarisation stimuli**

## Major Resources Tables

### Animals (in vivo studies)

| Species | Vendor or Source | Background Strain | Sex |
|---------|------------------|-------------------|-----|
| N/A     | -                | -                 | -   |

### Animal breeding

|                 | Species | Vendor or Source | Background Strain | Other Information |
|-----------------|---------|------------------|-------------------|-------------------|
| Parent - Male   | N/A     | -                | -                 | -                 |
| Parent - Female | N/A     | -                | -                 | -                 |

### Antibodies

| Target antigen | Vendor or Source | Catalog # | Working concentration | Lot # (preferred but not required) |
|----------------|------------------|-----------|-----------------------|------------------------------------|
| CD68           | Dako             | M0814     | 1:500                 | -                                  |
| SMA            | Dako             | M0851     | 1:8000                | -                                  |
| IgG            | Invitrogen       | 10400c    | 1:4000                | -                                  |

### Cultured Cells

| Name | Vendor or Source | Sex (F, M, or unknown) |
|------|------------------|------------------------|
| N/A  | -                | -                      |
